# Supplementary material for: The Coexistence of Infection Spread Patterns in the Global Dynamics of COVID-19 Dissemination
Source: Research Square preprint supplement (doi:10.21203/rs.3.rs-3827535/v1), 2024-01-05
Supplement: Supplementary file 1 [file ed8984e4a85347c932910575.pdf]

# The Coexistence of Infection Spread Patterns in the Global Dynamics of COVID-19 Dissemination

## Supplementary Information

Hiroyasu Inoue

Wataru Souma

Yoshi Fujiwara

### 1 Supplementary figures

The following is the list of figures referred to in the main text.

SI Figure 1: Number of infected cases in all countries. In the main text, only the 20 most populous countries are shown for improved visibility.

SI Figure 2: Log ratio of infected cases in all countries. In the main text, only the 20 most populous countries are shown for improved visibility.

SI Figure 3: The legends for SI Figures 1 and 2.

SI Figure 4: Pair plots between auxiliary data points.

SI Figure 5: Scree plots for each year. In the main text, the scree plot for the entire period is shown.

SI Figure 6: The first eigenvectors for the entire period, 2020, 2021, and 2022. The plots are coloured by region. The axes represent the argument and the ordinate.

SI Figure 7: The first eigenvectors for the entire period, 2020, 2021, and 2022. The plots are coloured by region. The figure shown on the complex plane corresponds to SI Figure 6 in the main text.

SI Figure 8: The first eigenvectors for the entire period, 2020, 2021, and 2022. The plots are coloured according to population. The axes represent the argument and the ordinate.

SI Figure 9: The first eigenvectors for the entire period, 2020, 2021, and 2022. The plots are coloured according to GDP per capita. The axes represent the argument and the ordinate.

SI Figure 10: Barycentres for each of five GDP per capita group based on rank. The panels show the entire period, 2020, 2021, and 2022. This figure corresponds to SI Figure 9.

SI Figure 11: The first eigenvectors for the entire period, 2020, 2021, and 2022. The plots are coloured according to the stringency index [2]. The axes represent the argument and the ordinate.

SI Figure 12: Barycentres for each of five stringency index group based on rank. The panels show the entire period, 2020, 2021, and 2022. This figure corresponds to SI Figure 11.

SI Figure 13: The first eigenvectors for the entire period, 2020, 2021, and 2022. The plots are coloured according to the containment and health index [2]. The axes represent the argument and the ordinate.

SI Figure 14: Barycentres for each of five containment and health index groups based on rank. The panels show the entire period, 2020, 2021, and 2022. This figure corresponds to SI Figure 13.

SI Figure 15: The first eigenvectors for the entire period, 2020, 2021, and 2022. The plots are coloured according to the vaccination rate. The axes represent the argument and the ordinate.

SI Figure 16: Barycentres for each of five vaccination rate groups based on rank. The panels show the entire period, 2020, 2021, and 2022. This figure corresponds to SI Figure 15.

SI Figure 17: The first eigenvectors for the entire period, 2020, 2021, and 2022. The plots are coloured according to the democracy index. The figure shown on the complex plane corresponds to Figure 5 in the main text.

SI Figure 18: The second eigenvectors for the entire period data. The panels are coloured by region, population, stringency index, and democracy index.

SI Figure 20: The second eigenvectors for the 2020 data. The panels are coloured by region, population, stringency index, and democracy index.

SI Figure 22: The second eigenvectors for the 2021 data. The panels are coloured by region, population, stringency index, and democracy index.

SI Figure 24: The second eigenvectors for the 2022 data. The panels are coloured by region, population, stringency index, and democracy index.

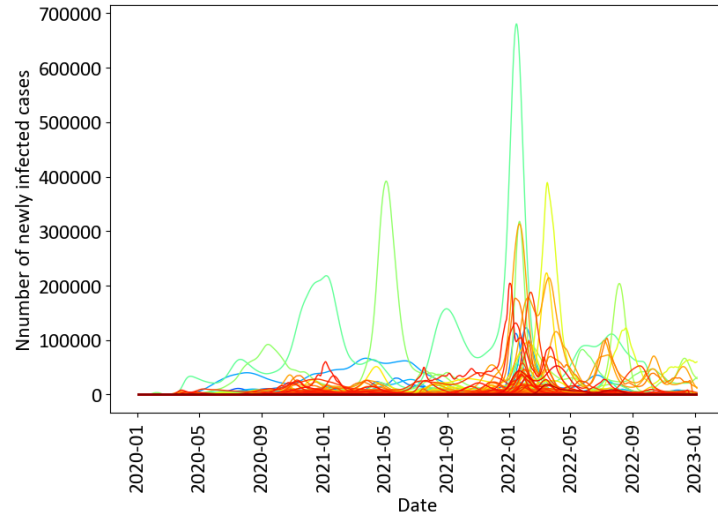

SI Figure 1: Number of infected cases in all countries. Each colour indicates a country. The correspondence of the colours with the countries is shown in SI Figure 3.

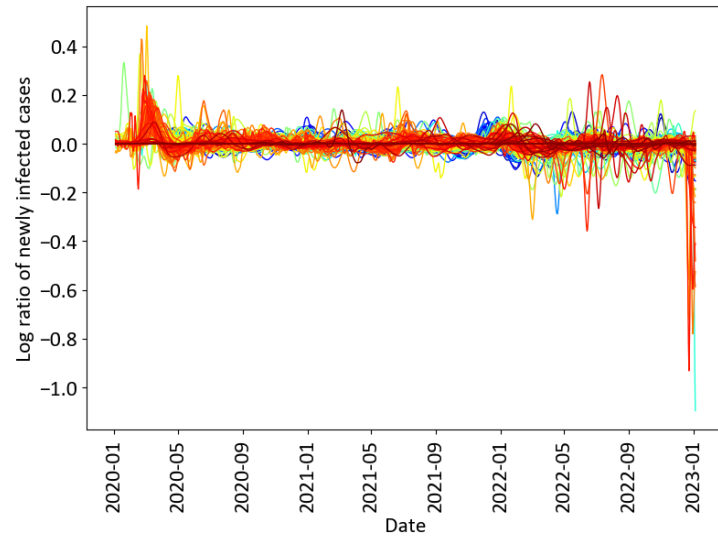

SI Figure 2: Log ratio of infected cases for all countries. Each colour indicates a country. The correspondence of the colours with the countries is shown in SI Figure 3.

| Country                          |                                  |                                  |                          |
|----------------------------------|----------------------------------|----------------------------------|--------------------------|
| Algeria                          | Antigua and Barbuda              | Bhutan                           | Greece                   |
| Angola                           | Argentina                        | Brunei Darussalam                | Guernsey                 |
| Benin                            | Aruba                            | Cambodia                         | Holy See                 |
| Burkina Faso                     | Bahamas                          | China                            | Hungary                  |
| Burundi                          | Barbados                         | Cyprus                           | Iceland                  |
| Cabo Verde                       | Bermuda                          | Georgia                          | Ireland                  |
| Cameroon                         | Bolivia                          | India                            | Isle of Man              |
| Central African Republic         | Bonaire                          | Indonesia                        | Italy                    |
| Chad                             | Brazil                           | Iran                             | Jersey                   |
| Comoros                          | British Virgin Islands           | Iraq                             | Latvia                   |
| Congo                            | Canada                           | Israel                           | Liechtenstein            |
| Côte d'Ivoire                    | Cayman Islands                   | Japan                            | Lithuania                |
| Democratic Republic of the Congo | Chile                            | Jordan                           | Luxembourg               |
| Djibouti                         | Colombia                         | Kazakhstan                       | Malta                    |
| Egypt                            | Costa Rica                       | Kuwait                           | Monaco                   |
| Equatorial Guinea                | Cuba                             | Kyrgyzstan                       | Montenegro               |
| Eritrea                          | Curaçao                          | Lao People's Democratic Republic | Netherlands              |
| Eswatini                         | Dominica                         | Lebanon                          | North Macedonia          |
| Ethiopia                         | Dominican Republic               | Malaysia                         | Norway                   |
| Gabon                            | Ecuador                          | Maldives                         | Poland                   |
| Gambia                           | El Salvador                      | Mongolia                         | Portugal                 |
| Ghana                            | Falkland Islands                 | Myanmar                          | Republic of Moldova      |
| Guinea                           | French Guiana                    | Nepal                            | Romania                  |
| Guinea Bissau                    | Greenland                        | Oman                             | Russian Federation       |
| Kenya                            | Grenada                          | Pakistan                         | San Marino               |
| Lesotho                          | Guadeloupe                       | Palestine                        | Serbia                   |
| Liberia                          | Guatemala                        | Philippines                      | Slovakia                 |
| Libya                            | Guyana                           | Qatar                            | Slovenia                 |
| Madagascar                       | Haiti                            | Republic of Korea                | Spain                    |
| Malawi                           | Honduras                         | Saudi Arabia                     | Sweden                   |
| Mali                             | Jamaica                          | Singapore                        | Switzerland              |
| Mauritania                       | Martinique                       | Sri Lanka                        | The United Kingdom       |
| Mauritius                        | Mexico                           | Syrian Arab Republic             | Ukraine                  |
| Mayotte                          | Montserrat                       | Tajikistan                       | American Samoa           |
| Morocco                          | Nicaragua                        | Thailand                         | Australia                |
| Mozambique                       | Panama                           | Timor Leste                      | Cook Islands             |
| Namibia                          | Paraguay                         | Turkey                           | Fiji                     |
| Niger                            | Peru                             | United Arab Emirates             | French Polynesia         |
| Nigeria                          | Puerto Rico                      | Uzbekistan                       | Guam                     |
| Rwanda                           | Saint Barthélemy                 | Viet Nam                         | Kiribati                 |
| Réunion                          | Saint Kitts and Nevis            | Yemen                            | Marshall Islands         |
| Saint Helena                     | Saint Lucia                      | Albania                          | Micronesia               |
| Sao Tome and Principe            | Saint Pierre and Miquelon        | Andorra                          | Nauru                    |
| Senegal                          | Saint Vincent and the Grenadines | Austria                          | New Caledonia            |
| Seychelles                       | Sint Maarten                     | Belarus                          | New Zealand              |
| Sierra Leone                     | Suriname                         | Belgium                          | Niue                     |
| Somalia                          | Trinidad and Tobago              | Bosnia and Herzegovina           | Northern Mariana Islands |
| South Africa                     | Turks and Caicos Islands         | Bulgaria                         | Palau                    |
| South Sudan                      | United States Virgin Islands     | Croatia                          | Papua New Guinea         |
| Sudan                            | United States of America         | Czechia                          | Pitcairn Islands         |
| Togo                             | Uruguay                          | Denmark                          | Samoa                    |
| Tunisia                          | Venezuela                        | Estonia                          | Solomon Islands          |
| Uganda                           | Afghanistan                      | Faroe Islands                    | Tokelau                  |
| United Republic of Tanzania      | Armenia                          | Finland                          | Tonga                    |
| Zambia                           | Azerbaijan                       | France                           | Tuvalu                   |
| Zimbabwe                         | Bahrain                          | Germany                          | Vanuatu                  |
| Anguilla                         | Bangladesh                       | Gibraltar                        | Wallis and Futuna        |

SI Figure 3: Correspondence of colours with countries. These colours are used in SI Figures 1 and 2.

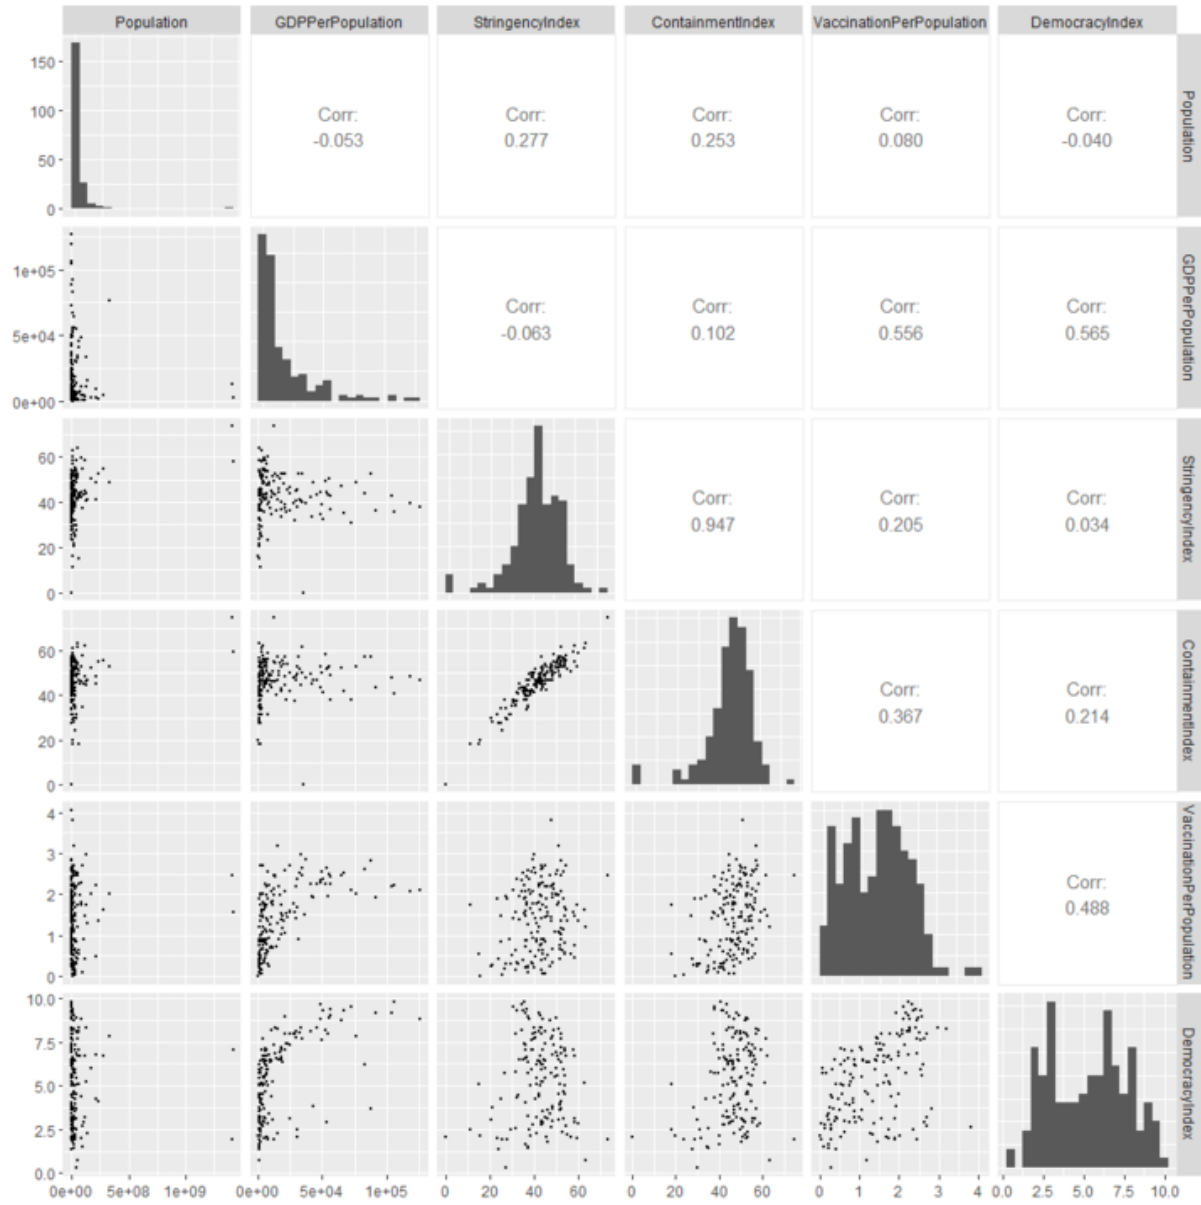

SI Figure 4: Pair plots between auxiliary data points.

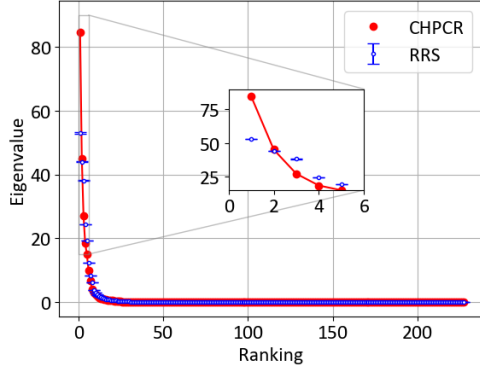

(a) 2020

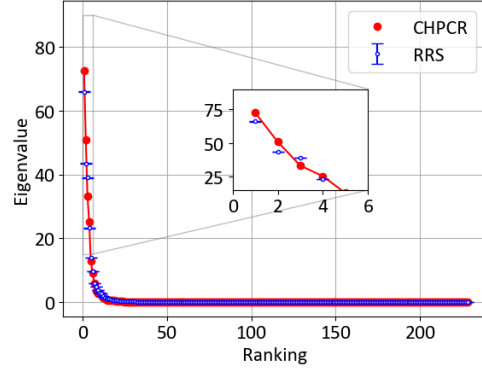

(b) 2021

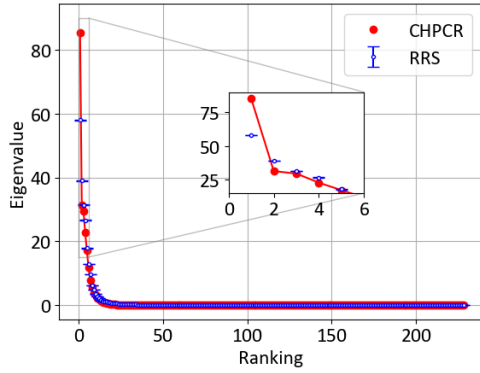

(c) 2022

SI Figure 5: Scree plots of CHPCA and the RRS. Each panel covers different years, i.e., 2020, 2021, and 2020. The error bars for the RRS indicate the 1% significance level, which is 2.33 times the standard error.

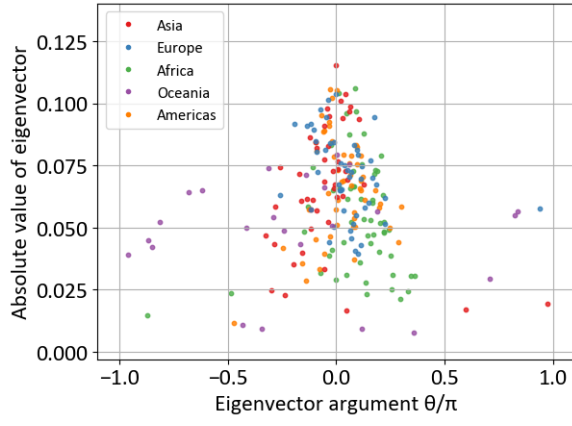

(a) Entire period

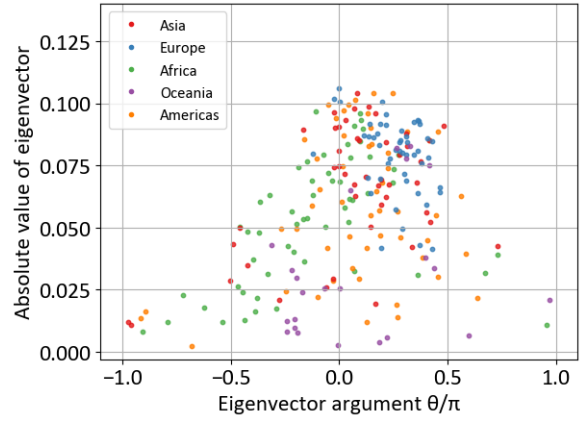

(b) 2020

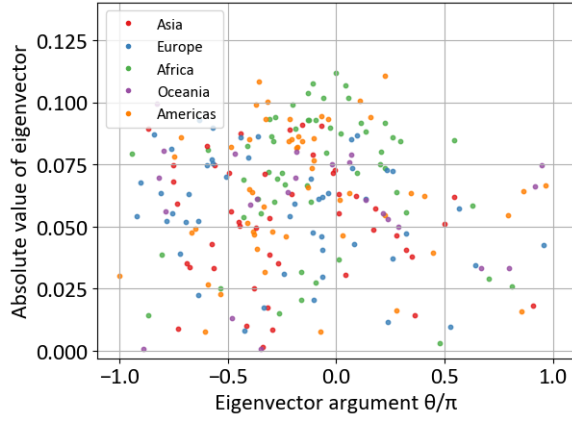

(c) 2021

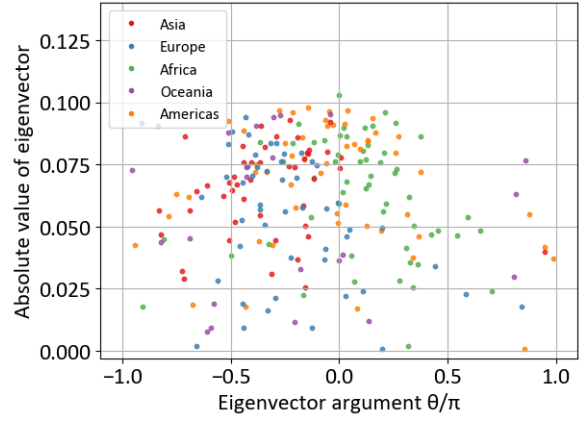

(d) 2022

SI Figure 6: Eigenvectors with the first eigenvalue coloured by region. The abscissa corresponds to the argument, and the ordinate corresponds to the absolute value (amplitude) of the eigenvector. Note that time progresses from right to left. Panels (a-d) show the entire period, 2020, 2021, and 2022, respectively.

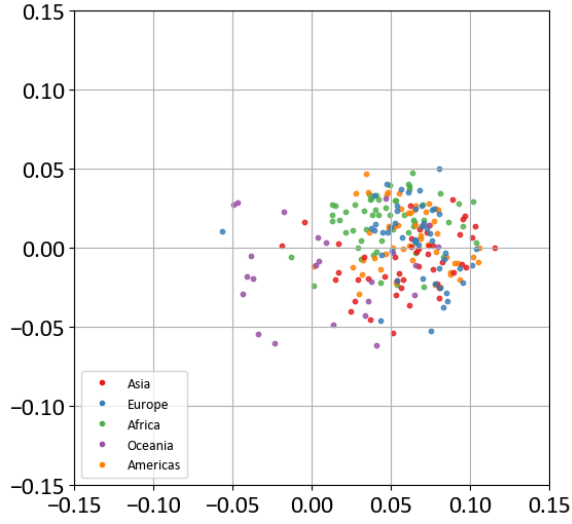

(a) Entire period

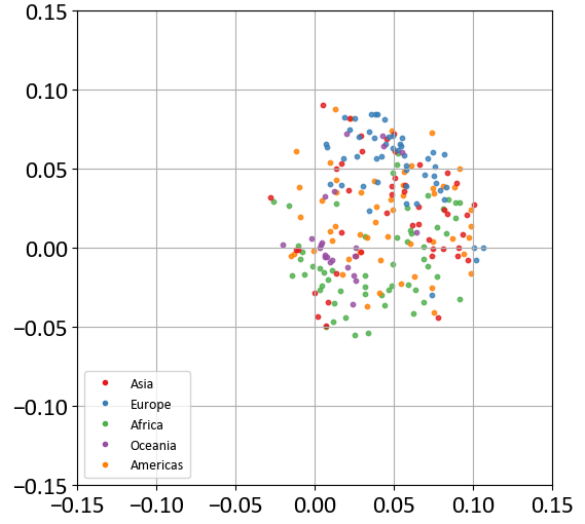

(b) 2020

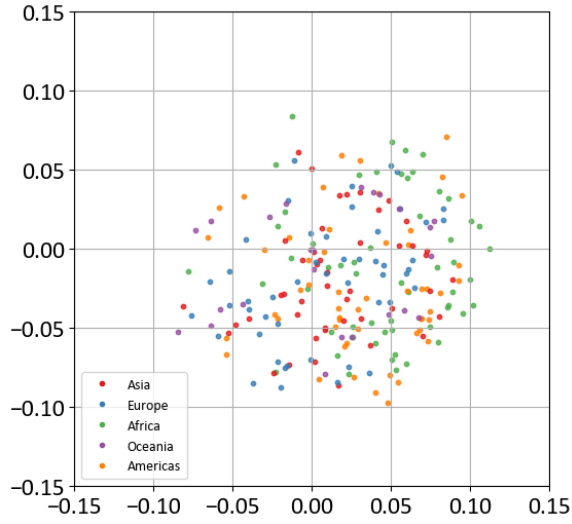

(c) 2021

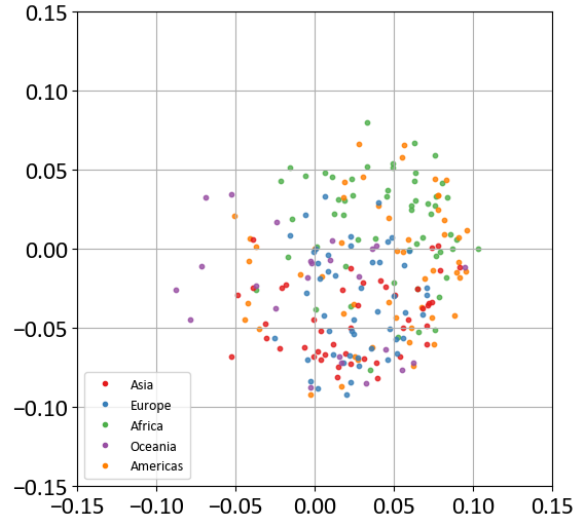

(d) 2022

SI Figure 7: Eigenvectors, with the first eigenvalue coloured by region. The abscissa corresponds to the real axis, and the ordinate corresponds to the imaginary axis. Panels (a-d) represent the entire period, 2020, 2021, and 2022, respectively. Note that time progresses from right to left.



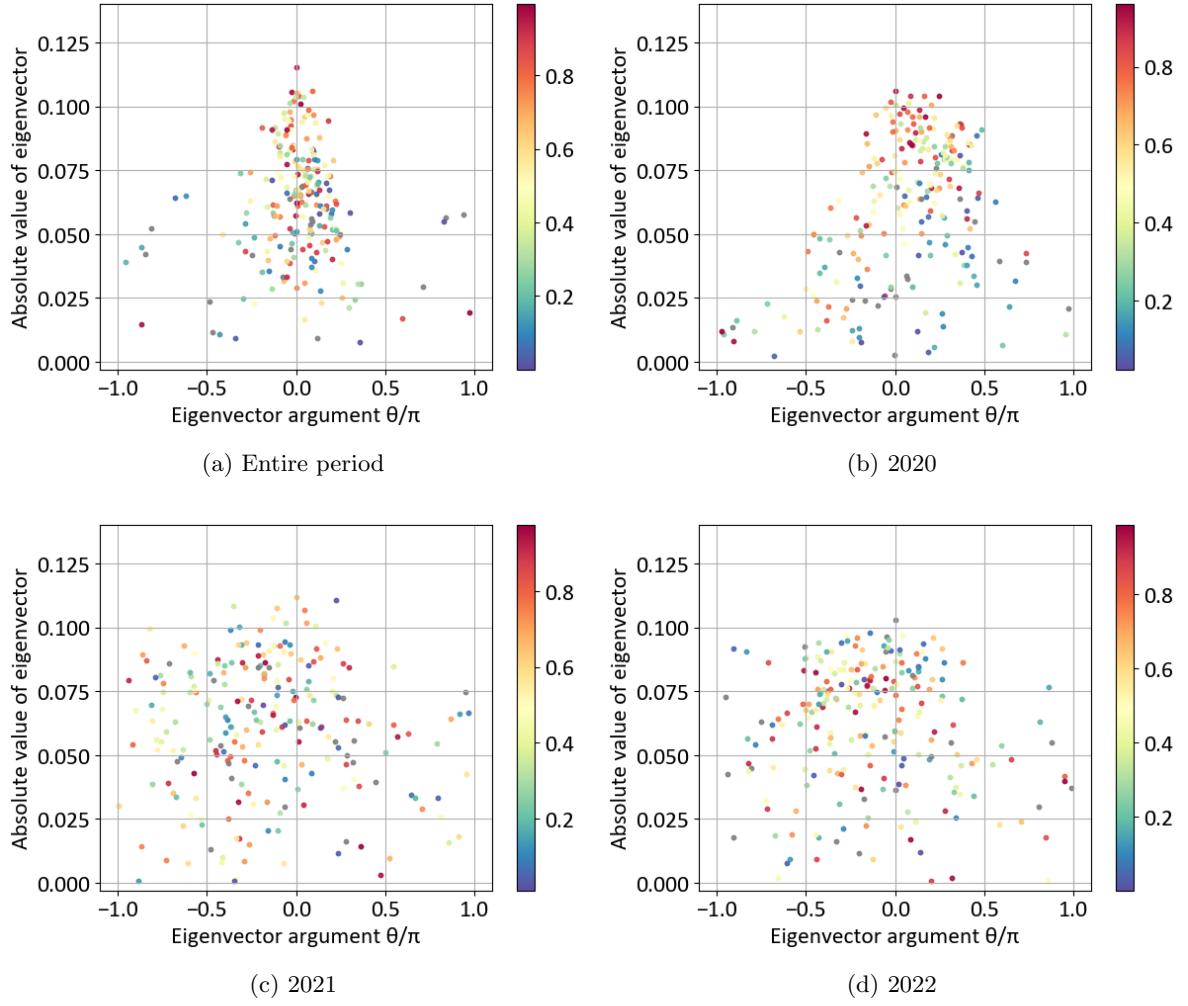

SI Figure 8: Eigenvectors with the first eigenvalue coloured according to population. The abscissa corresponds to the argument, and the ordinate corresponds to the absolute value (amplitude) of the eigenvector. Note that time progresses from right to left. Panels (a-d) represent the entire period, 2020, 2021, and 2022, respectively. The population data for each year are used for the analysis of the corresponding year, while the 2020 population data are used for the analysis of the entire period. In addition, the colour denotes the rank of the analysed countries by population. If a country has no population record, it is coloured grey.

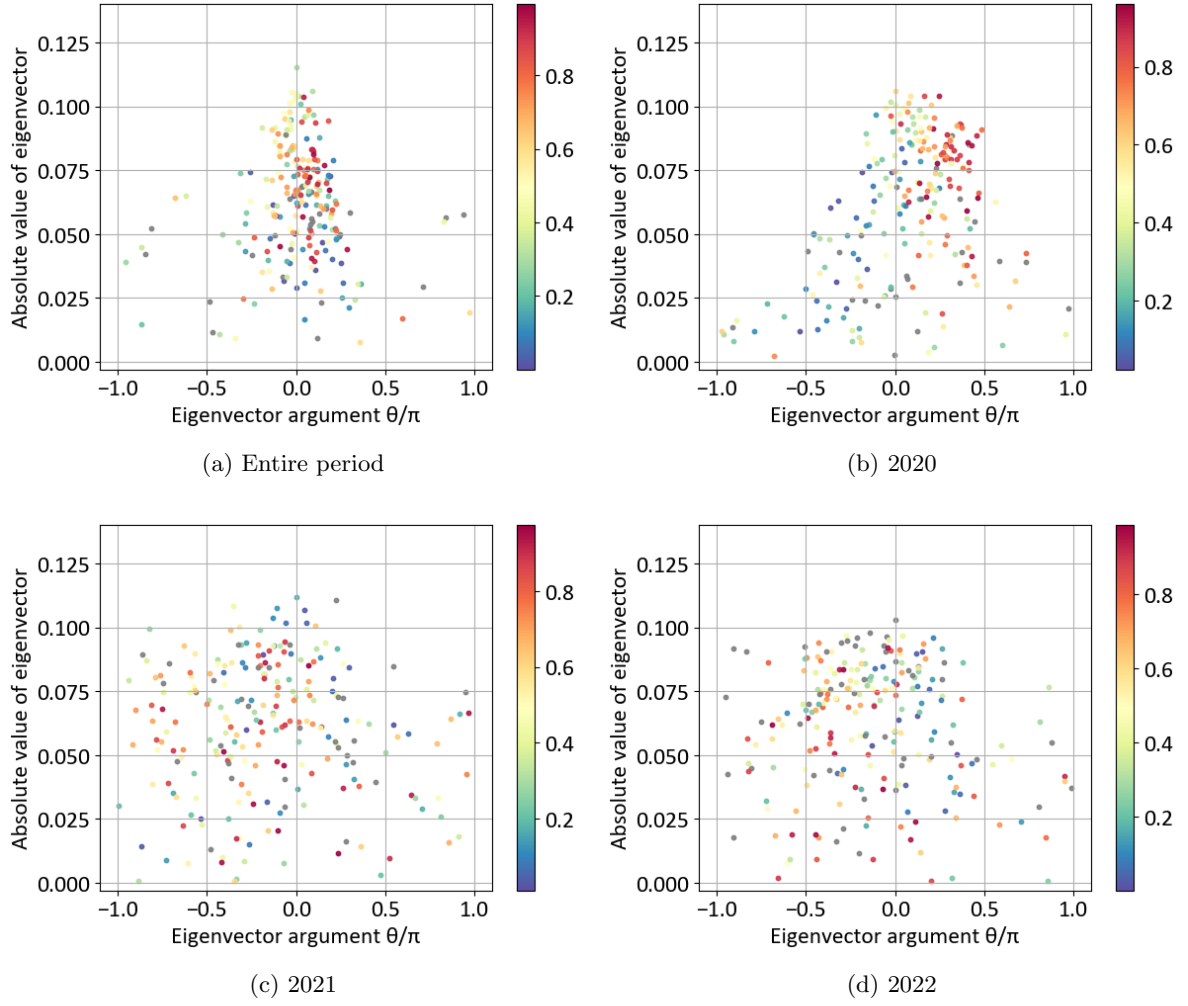

SI Figure 9: Eigenvectors, with the first eigenvalue coloured according to the GDP per capita. The abscissa corresponds to the real axis, and the ordinate corresponds to the imaginary axis. Panels (a-d) represent the entire period, 2020, 2021, and 2022, respectively. The population and GDP data for each year are used for the corresponding year, while the 2020 population and GDP data are used for the analysis of the entire period. In addition, the colour indicates the rank of the analysed countries by GDP per capita. If a country has no population or GDP record, it is coloured grey.

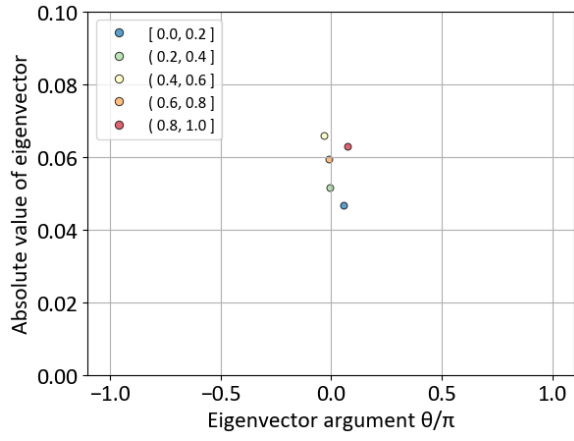

(a) Entire period

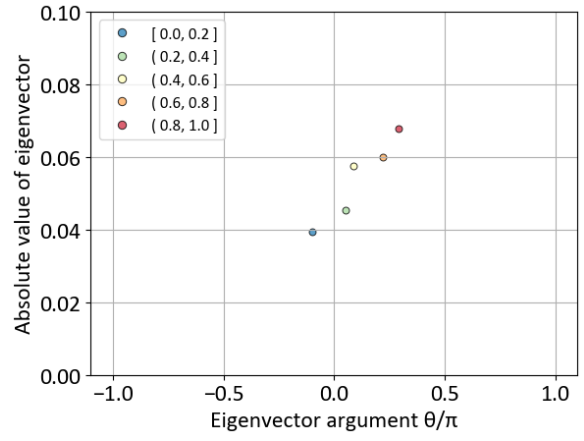

(b) 2020

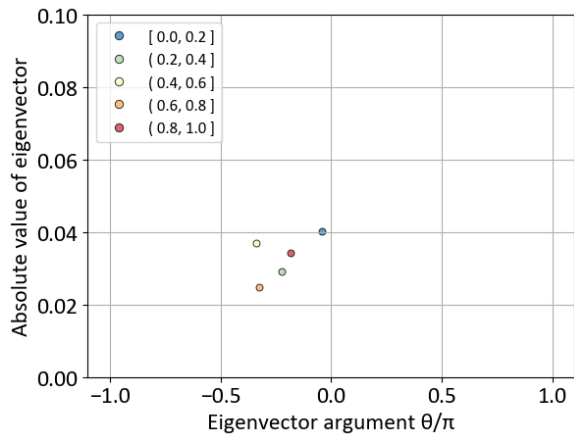

(c) 2021

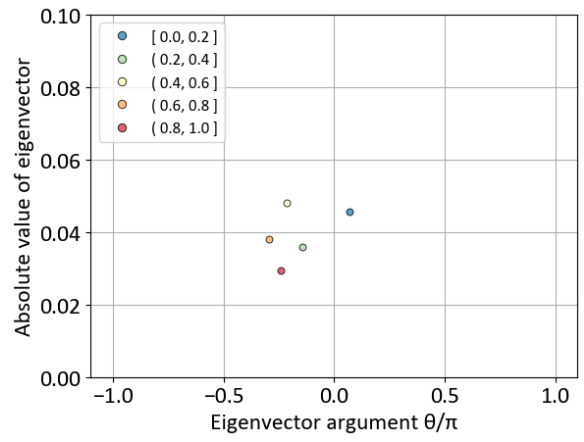

(d) 2022

SI Figure 10: Barycentres for five groups of GDP per capita based on rank. The abscissa corresponds to the argument, and the ordinate corresponds to the absolute value (amplitude) of the eigenvector. Panels (a-d) represent the entire period, 2020, 2021, and 2022, respectively. Note that time progresses from right to left.

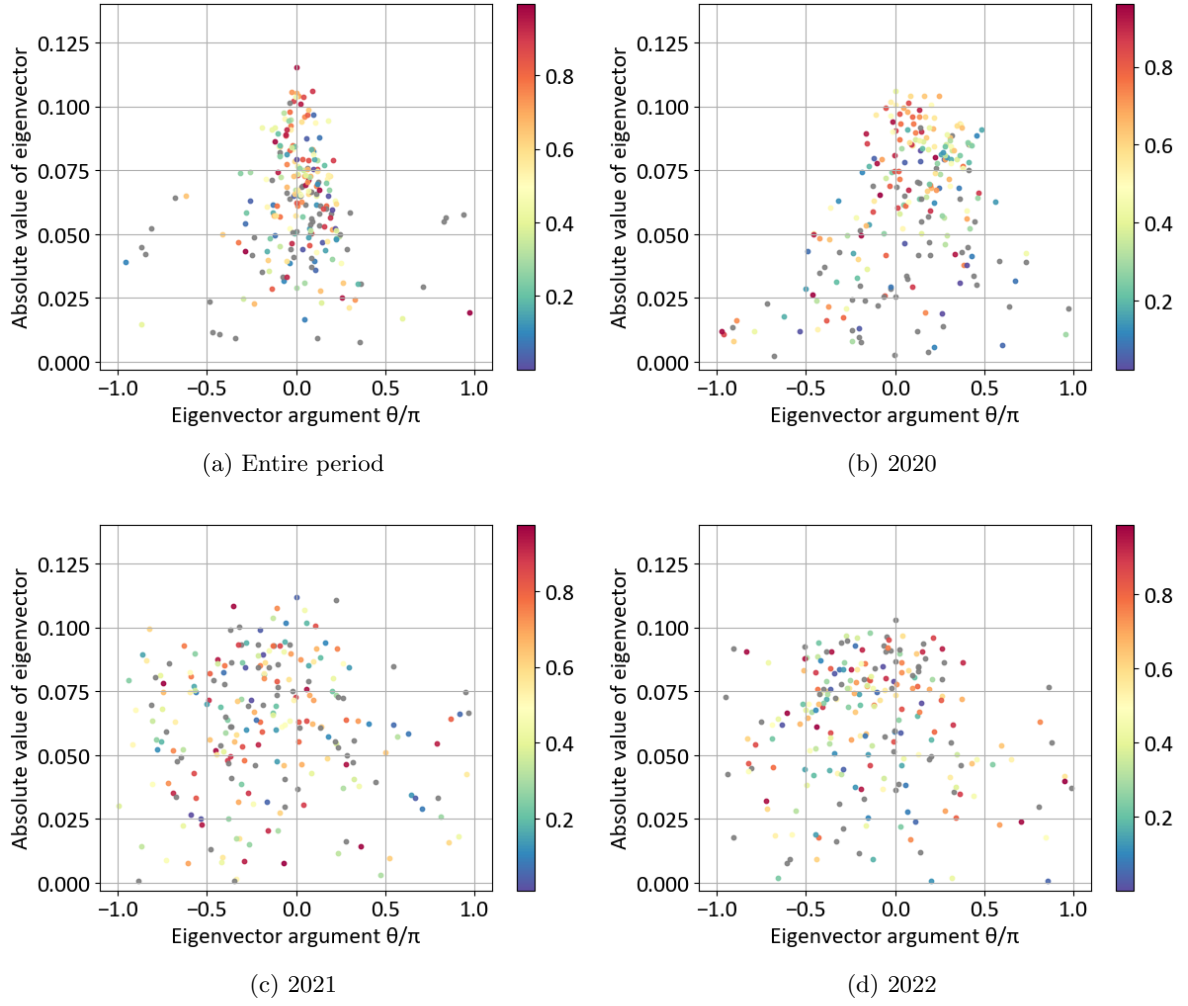

SI Figure 11: Eigenvectors, with the first eigenvalue coloured according to the stringency index. The abscissa corresponds to the argument, and the ordinate corresponds to the absolute value (amplitude) of the eigenvector. Note that time progresses from right to left. Panels (a-d) represent the entire period, 2020, 2021, and 2022, respectively. The mean of each year's stringency index data is used for the corresponding year, while the mean of the entire period is used for the analysis of the entire period. In addition, the colour indicates the rank of the countries by stringency index. If a country has no stringency index record, it is coloured grey.

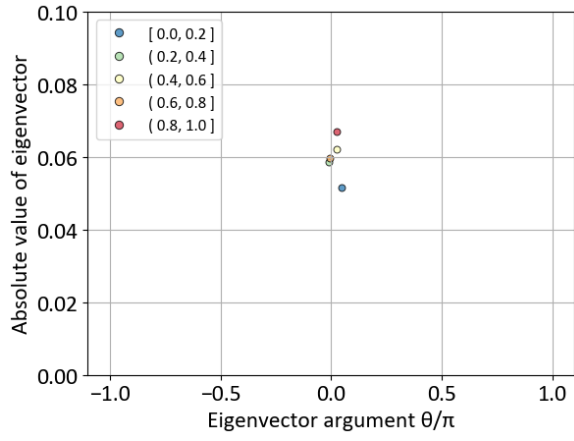

(a) Entire period

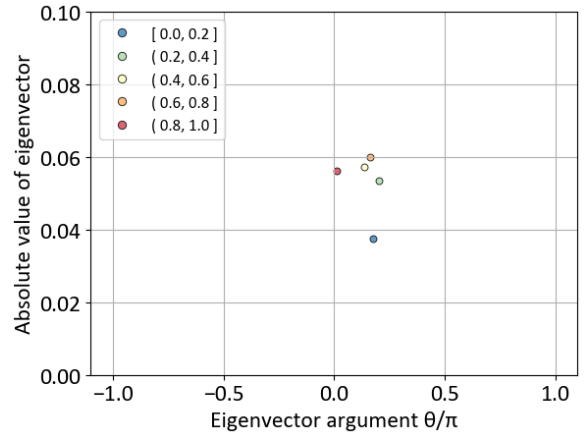

(b) 2020

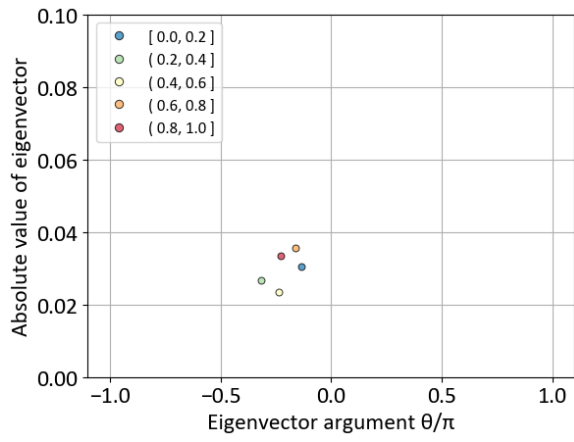

(c) 2021

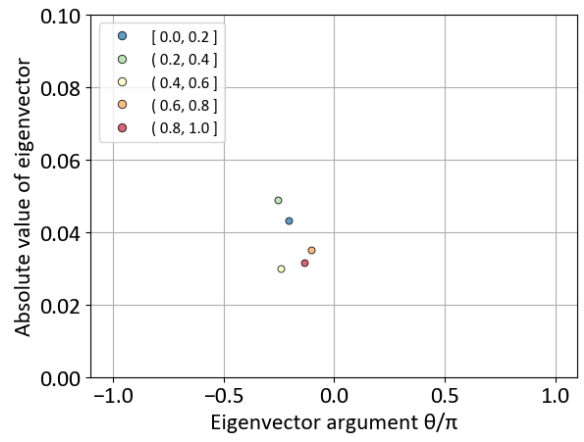

(d) 2022

SI Figure 12: Barycentres for five groups of each stringency index based on rank. The abscissa corresponds to the argument, and the ordinate corresponds to the absolute value (amplitude) of the eigenvector. Panels (a-d) represent the entire period, 2020, 2021, and 2022, respectively. Note that time progresses from right to left.

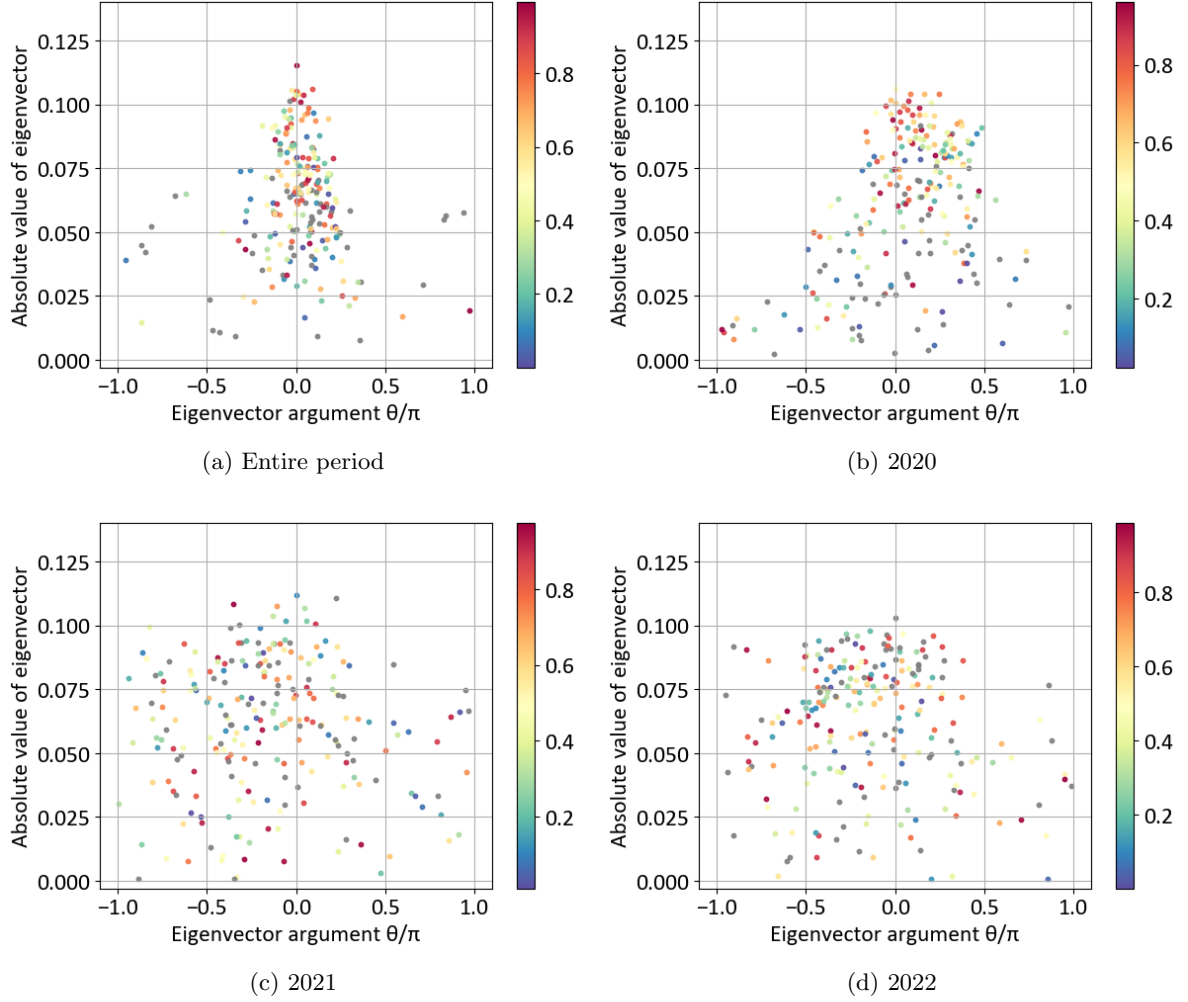

SI Figure 13: Eigenvectors, with the first eigenvalue coloured according to the containment and health index. The abscissa corresponds to the argument, and the ordinate corresponds to the absolute value (amplitude) of the eigenvector. Note that time progresses from right to left. Panels (a-d) represent the entire period, 2020, 2021, and 2022, respectively. The mean of each year's stringency index data is used for the corresponding year, while the mean of the entire period is used for the entire period analyses. In addition, the colour indicates the rank by the containment and health index among the analysed countries. If a country has no containment and health index record, it is coloured grey.

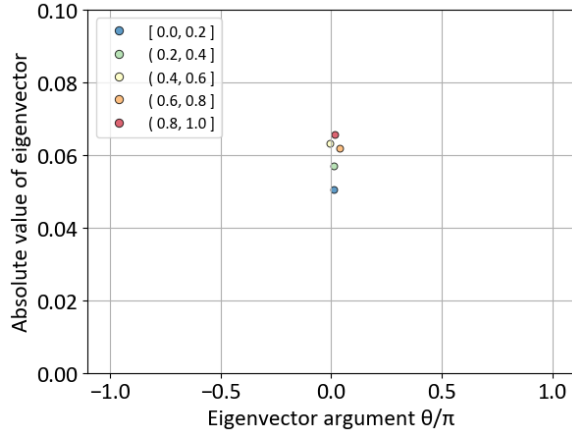

(a) Entire period

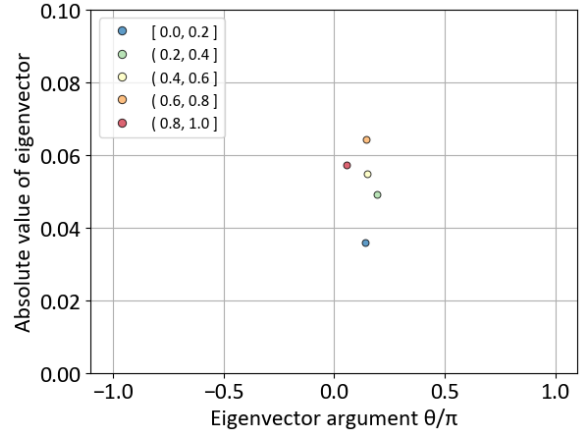

(b) 2020

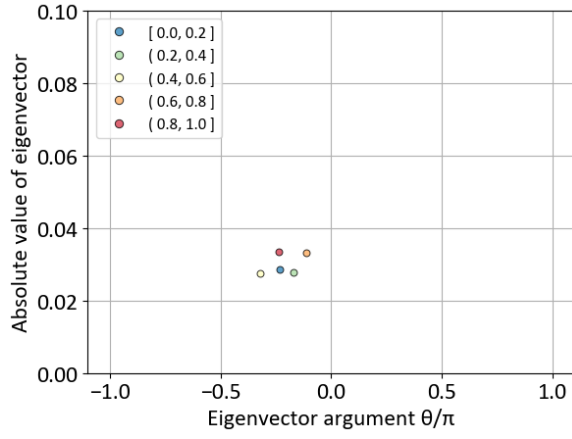

(c) 2021

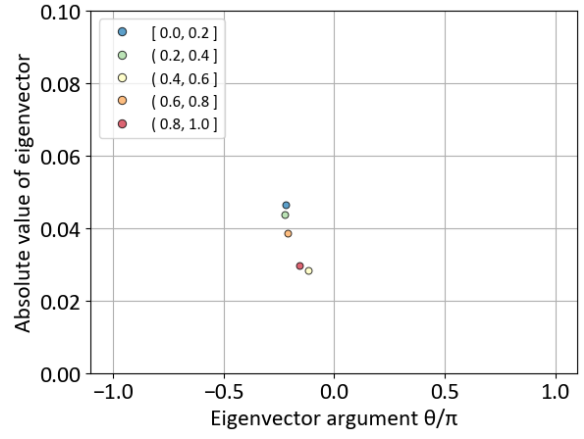

(d) 2022

SI Figure 14: Barycentres for five groups of the containment and health index group based on rank. The abscissa corresponds to the argument, and the ordinate corresponds to the absolute value (amplitude) of the eigenvector. Panels (a-d) represent the entire period, 2020, 2021, and 2022, respectively. Note that time progresses from right to left.

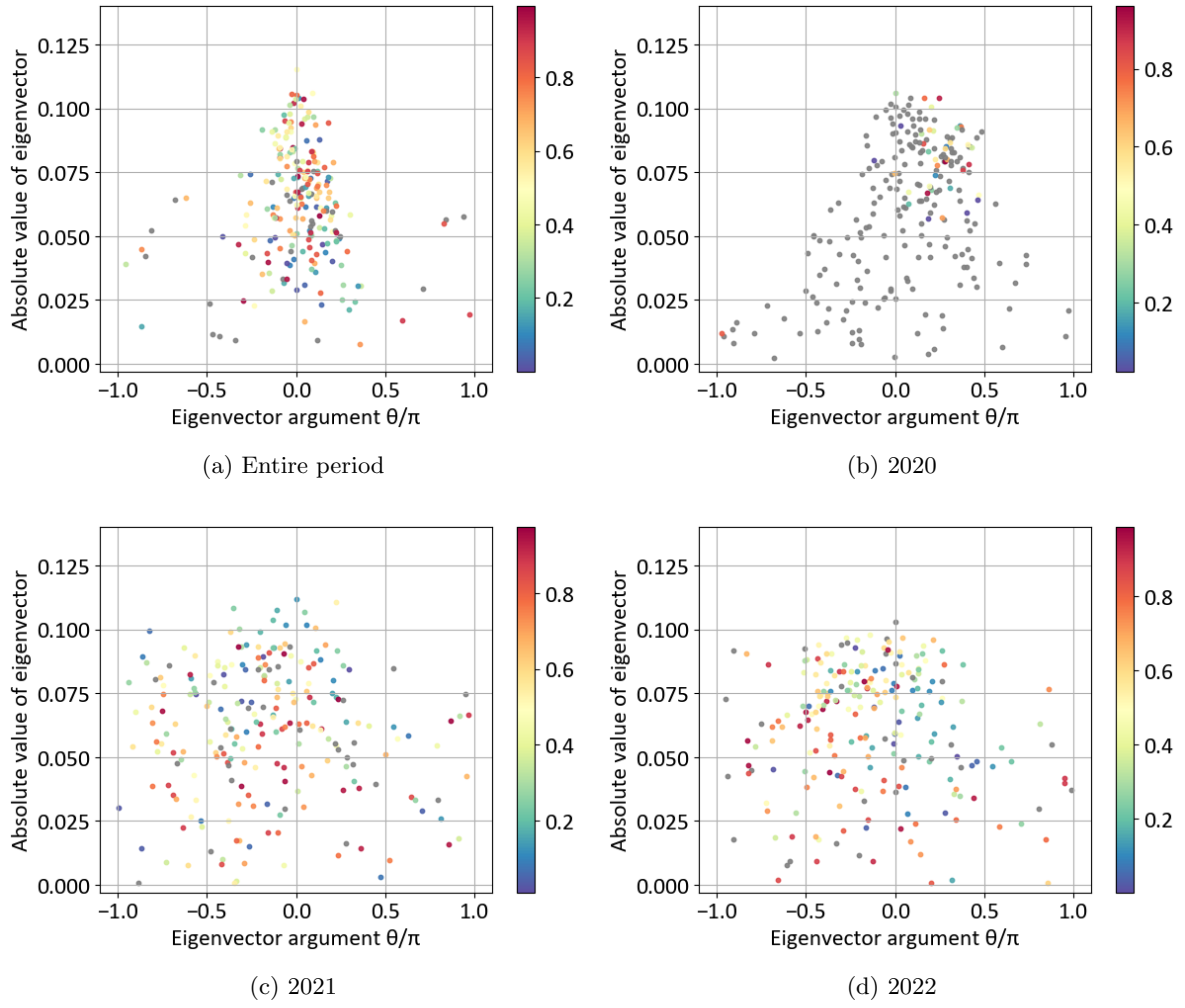

SI Figure 15: Eigenvectors, with the first eigenvalue coloured according to the vaccination rate. The abscissa corresponds to the argument, and the ordinate corresponds to the absolute value (amplitude) of the eigenvector. Note that time progresses from right to left. Panels (a-d) represent the entire period, 2020, 2021, and 2022, respectively. Each year's vaccination rate is used for the corresponding year, while the average vaccination rate is used for the entire period. In addition, the colour indicates the rank of the countries by vaccination rate. If a country has no vaccination record in the entire period or in 2020, it is coloured grey.



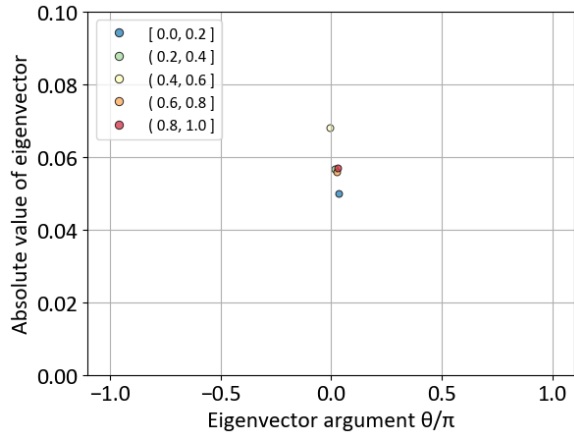

(a) Entire period

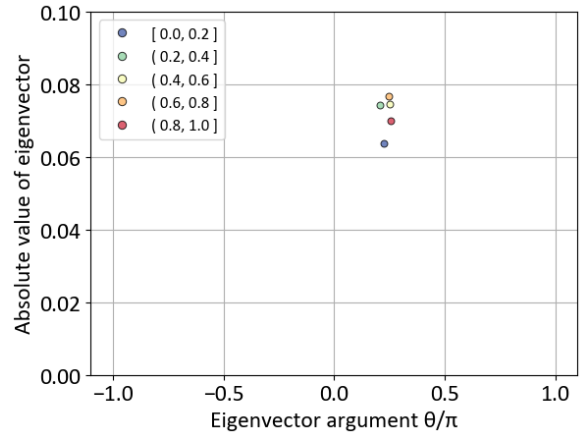

(b) 2020

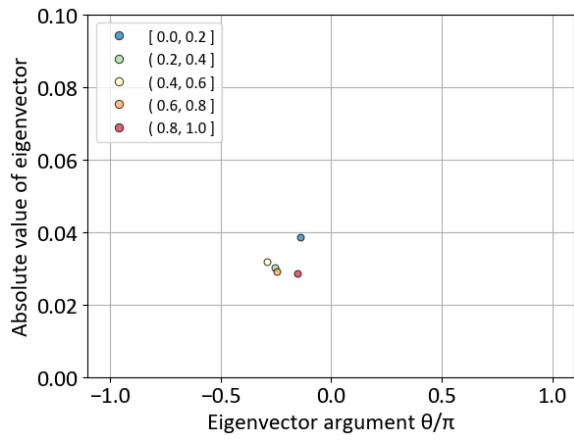

(c) 2021

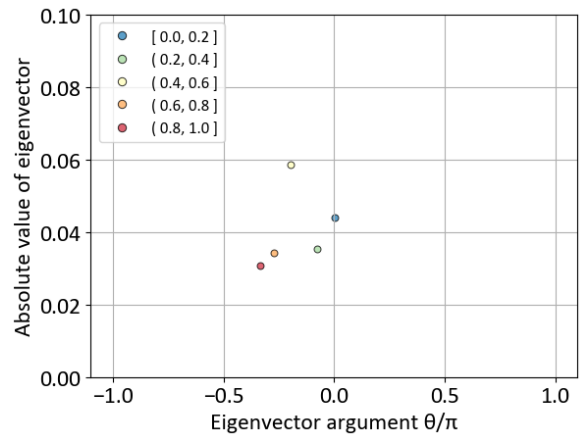

(d) 2022

SI Figure 16: Barycentres for five groups of the vaccination rate based on rank. The abscissa corresponds to the real axis, and the ordinate corresponds to the imaginary axis. Panels (a-d) represent the entire period, 2020, 2021, and 2022, respectively. Note that time progresses from right to left.

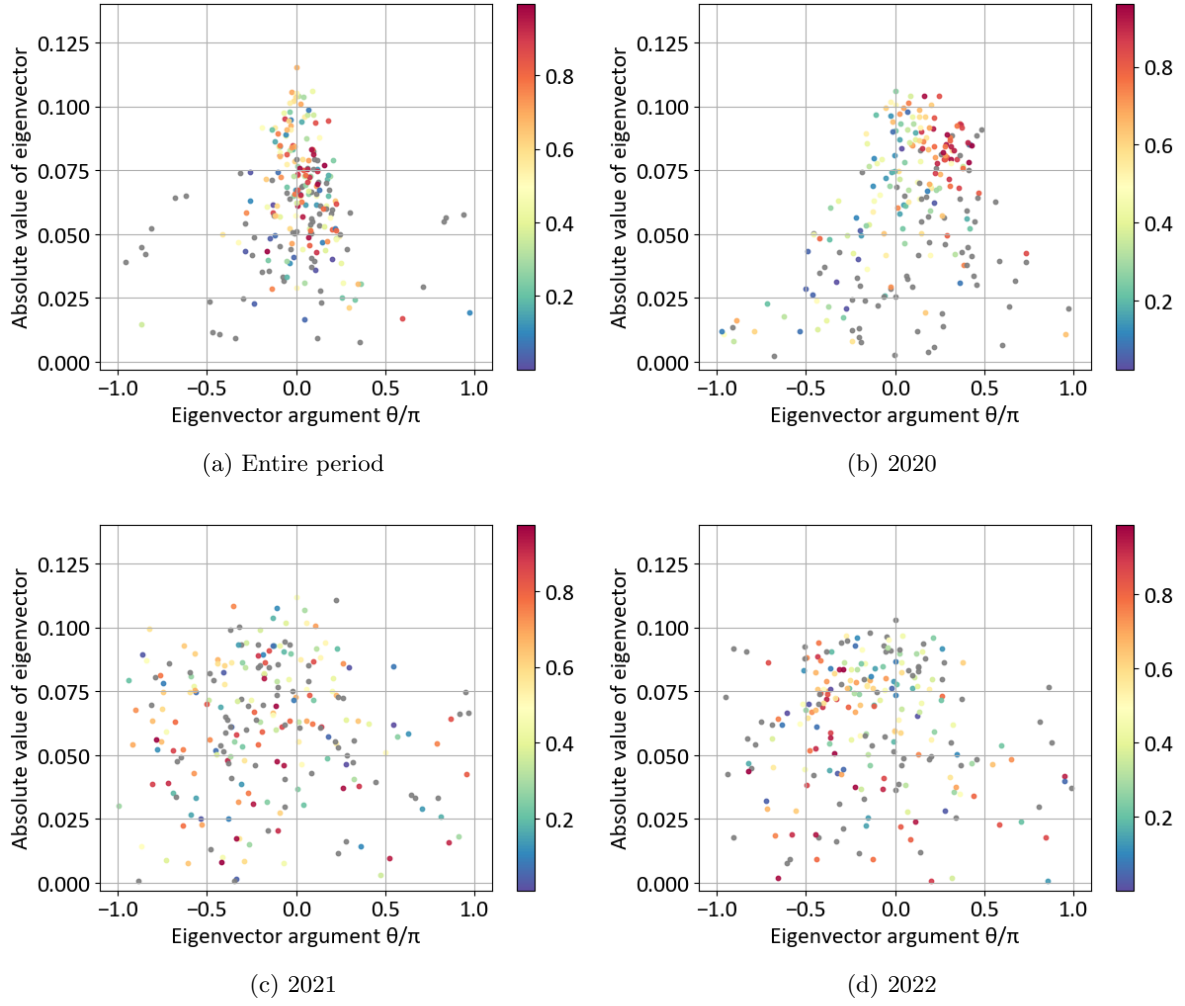

SI Figure 17: Eigenvectors, with the first eigenvalue coloured according to the democracy index. The democracy index was obtained from the Economist Intelligence Unit [1]. The abscissa corresponds to the argument, and the ordinate corresponds to the absolute value (amplitude) of the eigenvector. Note that time progresses from right to left. Panels (a-d) represent the entire period, 2020, 2021, and 2022, respectively. Each year's democracy index data are used for the analysis of the corresponding year, while the 2020 democracy index data are used for the analysis of the entire period. In addition, the colour represents the rank of the analysed countries by the democracy index. If a country has no democracy index record, it is coloured grey.

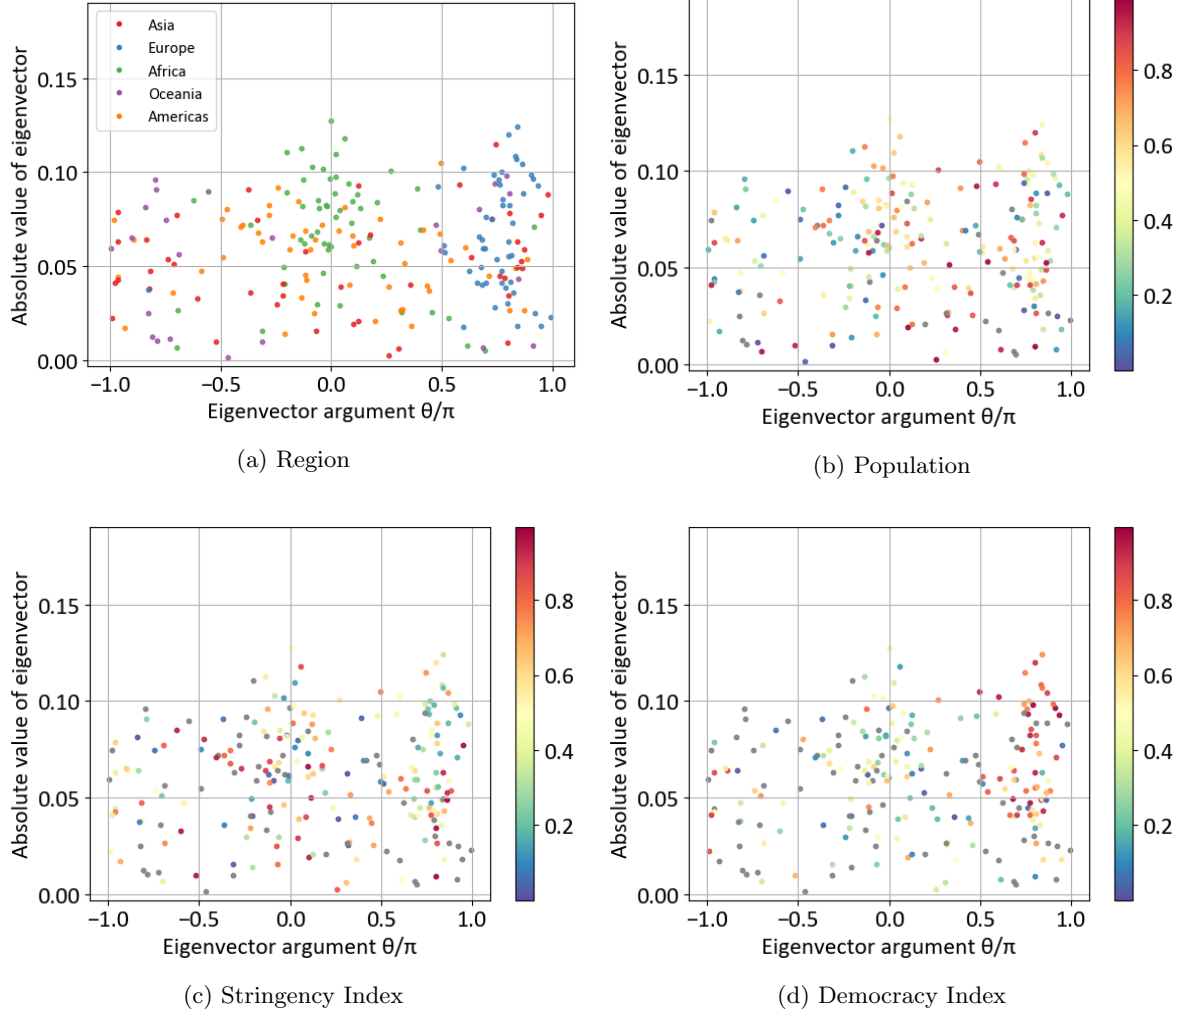

SI Figure 18: The second eigenvectors for the entire period of data. The panels are coloured by (a) region, (b) population, (c) stringency index [2], and (d) democracy index [1]. If a country has no population, stringency index, or democracy index data, it is coloured grey. The abscissa corresponds to the argument, and the ordinate corresponds to the absolute value (amplitude) of the eigenvector. Note that time progresses from right to left.

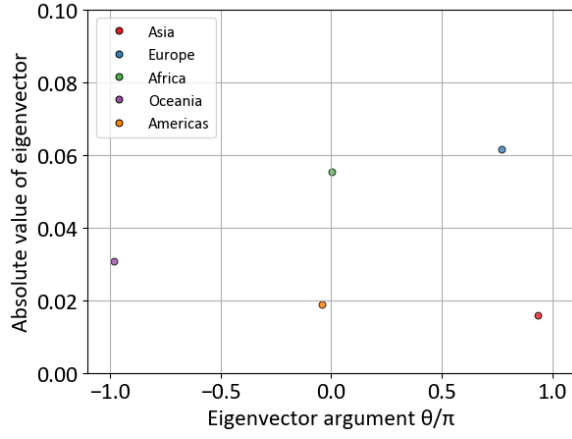

(a) Region

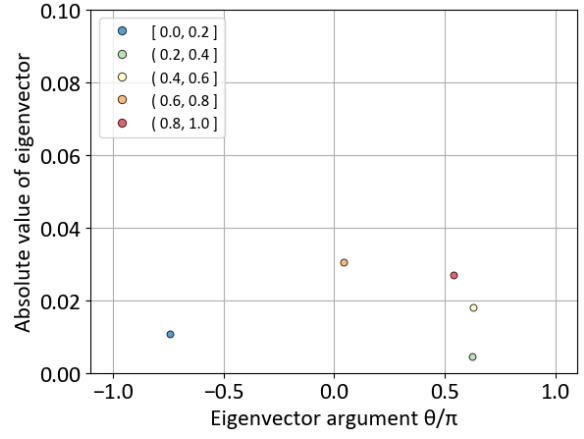

(b) Population

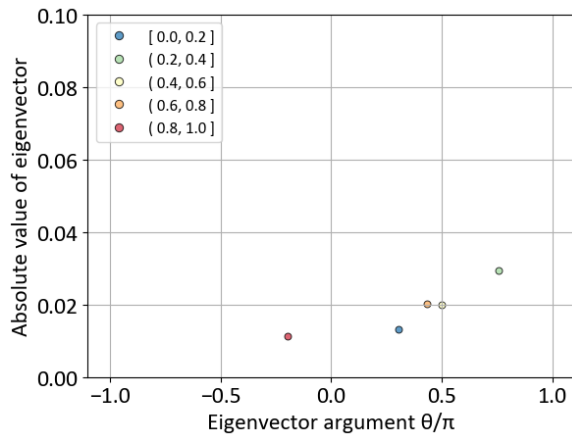

(c) Stringency Index

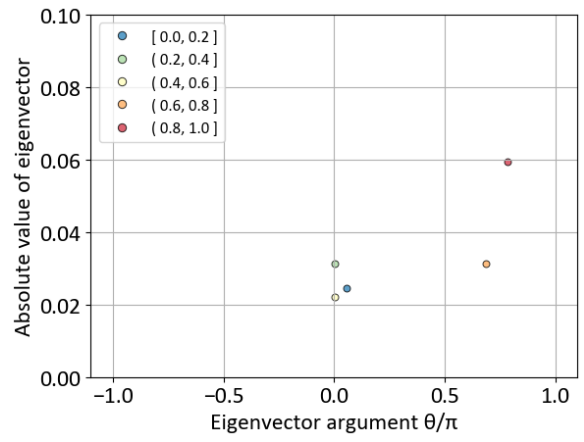

(d) Democracy Index

SI Figure 19: Barycentres of the second eigenvectors for data of the entire period. The panels are coloured by (a) region, (b) population, (c) stringency index [2], and (d) democracy index [1]. The abscissa corresponds to the argument, and the ordinate corresponds to the absolute value (amplitude) of the eigenvector. Note that time progresses from right to left.

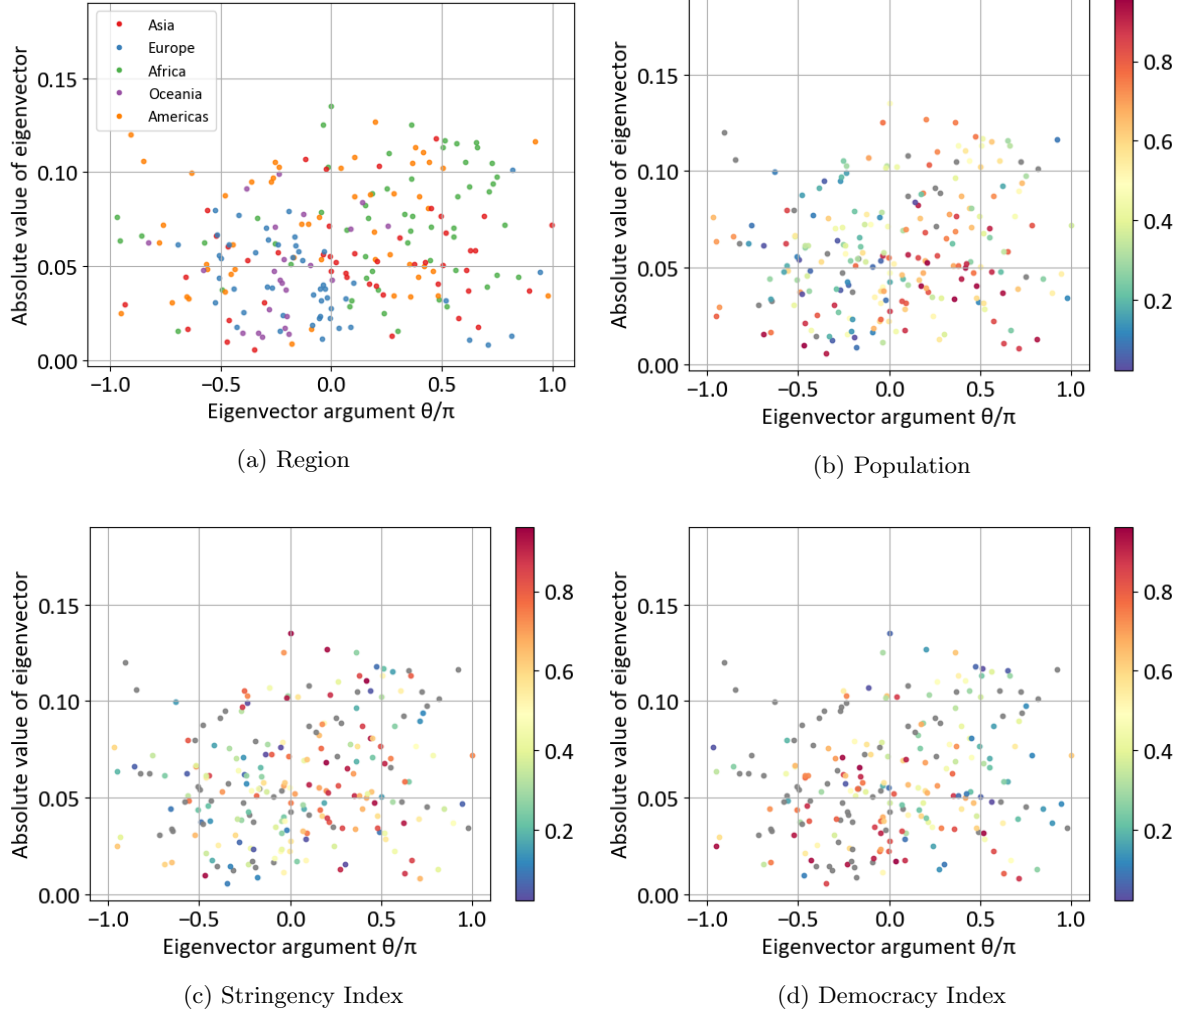

SI Figure 20: The second eigenvector for the 2020 data. The panels are coloured by (a) region, (b) population, (c) stringency index [2], and (d) democracy index [1]. If a country has no population, stringency index, or democracy index data, it is coloured grey. The abscissa corresponds to the real axis, and the ordinate corresponds to the imaginary axis. Note that time progresses from right to left.

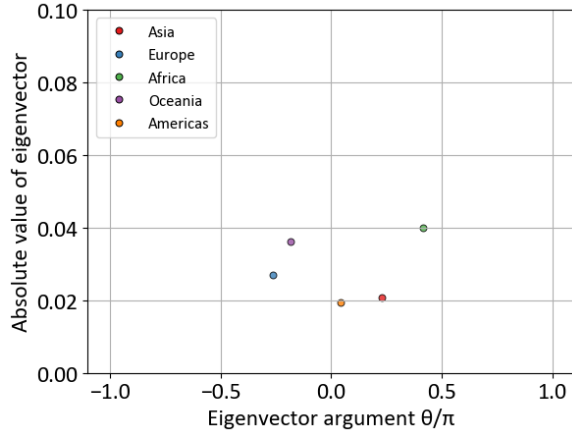

(a) Region

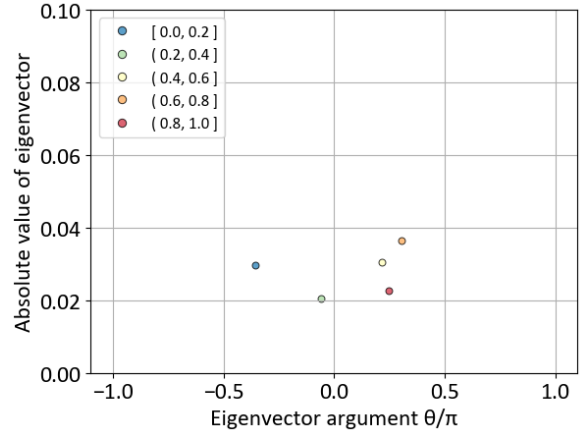

(b) Population

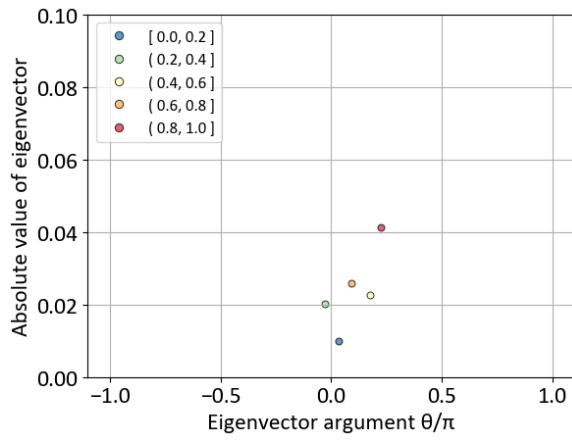

(c) Stringency Index

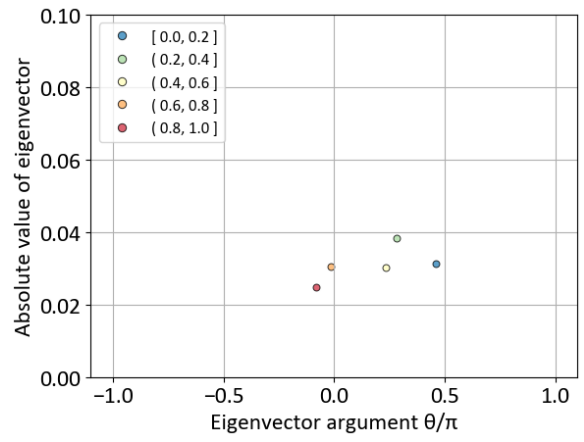

(d) Democracy Index

SI Figure 21: Barycentres of the second eigenvectors for the 2020 data. The panels are coloured by (a) region, (b) population, (c) stringency index [2], and (d) democracy index [1]. The abscissa corresponds to the argument, and the ordinate corresponds to the absolute value (amplitude) of the eigenvector. Note that time progresses from right to left.

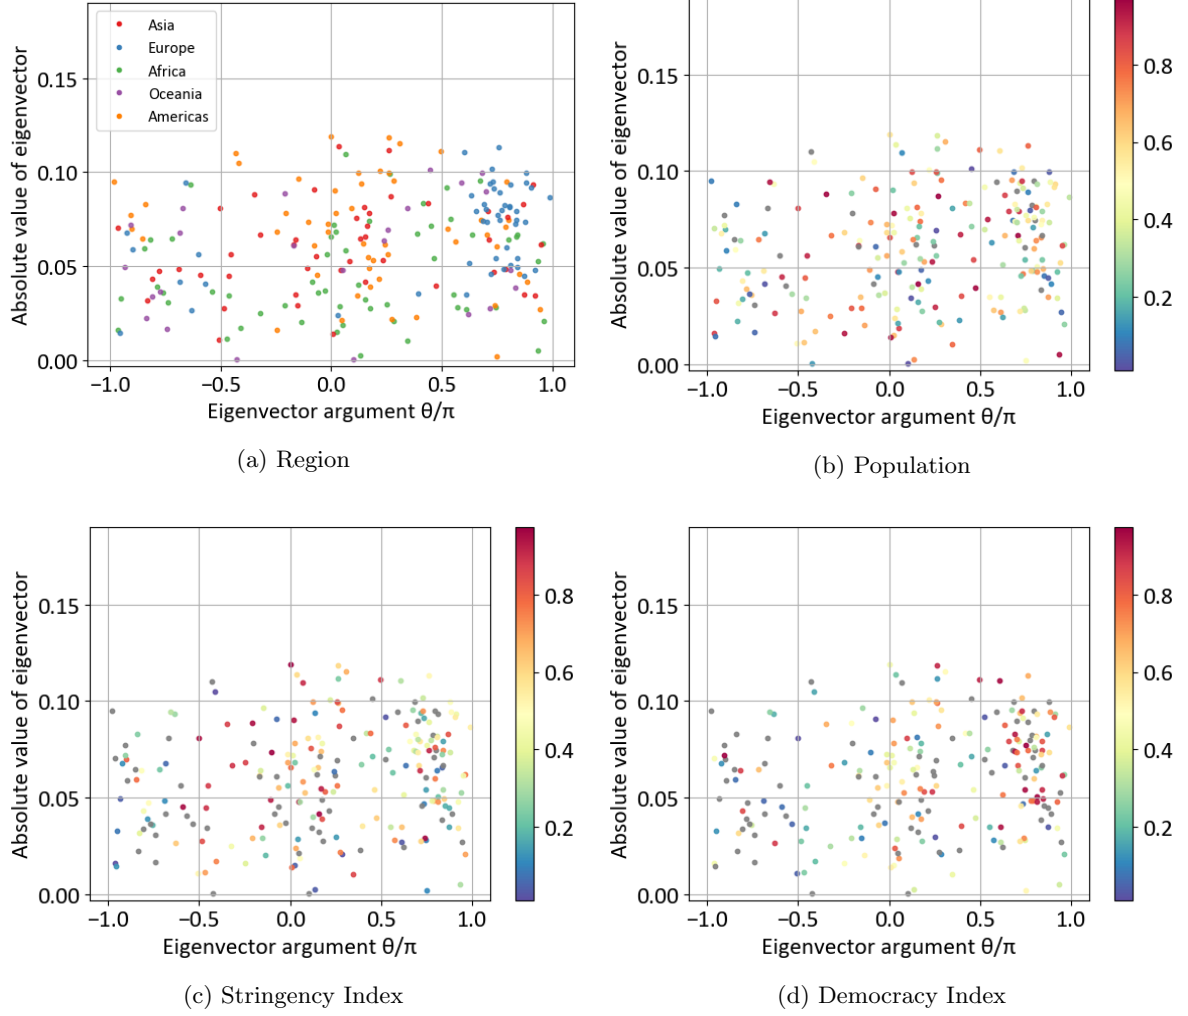

SI Figure 22: The second eigenvectors for the 2021 data. The panels are coloured by region, population, stringency index [2], and democracy index [1]. If a country has no population, stringency index, or democracy index data, it is coloured grey. The abscissa corresponds to the real axis, and the ordinate corresponds to the imaginary axis. Note that time progresses from right to left.

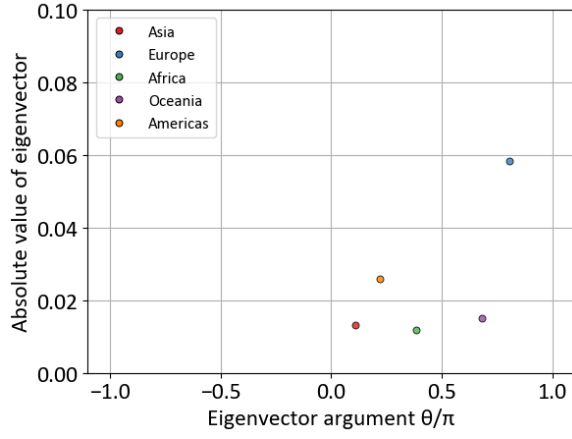

(a) Region

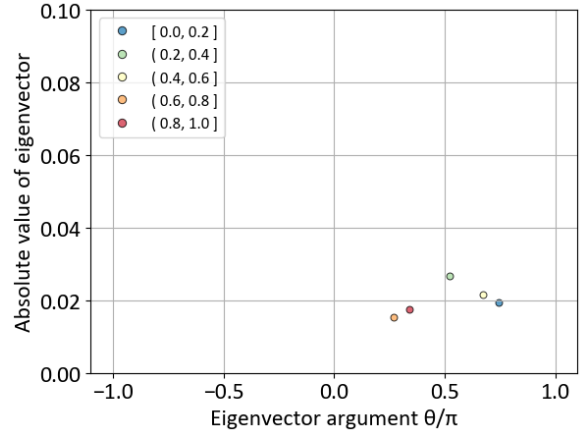

(b) Population

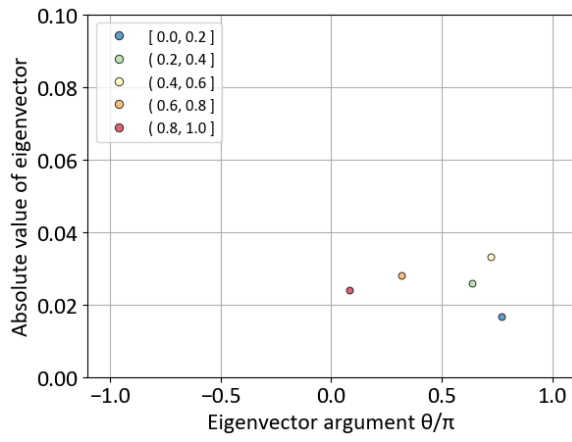

(c) Stringency Index

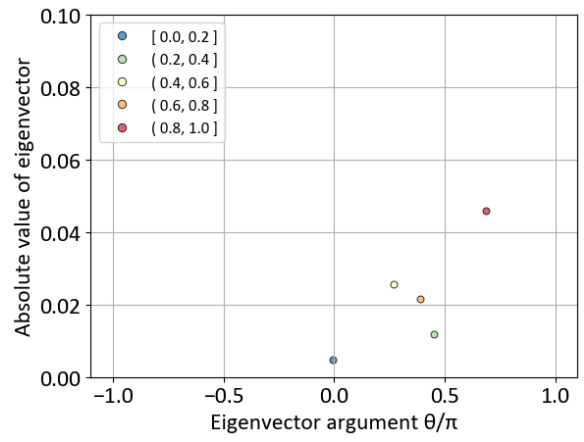

(d) Democracy Index

SI Figure 23: Barycentres of the second eigenvectors for the 2021 data. The panels are coloured by (a) region, (b) population, (c) stringency index [2], and (d) democracy index [1]. The abscissa corresponds to the argument, and the ordinate corresponds to the absolute value (amplitude) of the eigenvector. Note that time progresses from right to left.



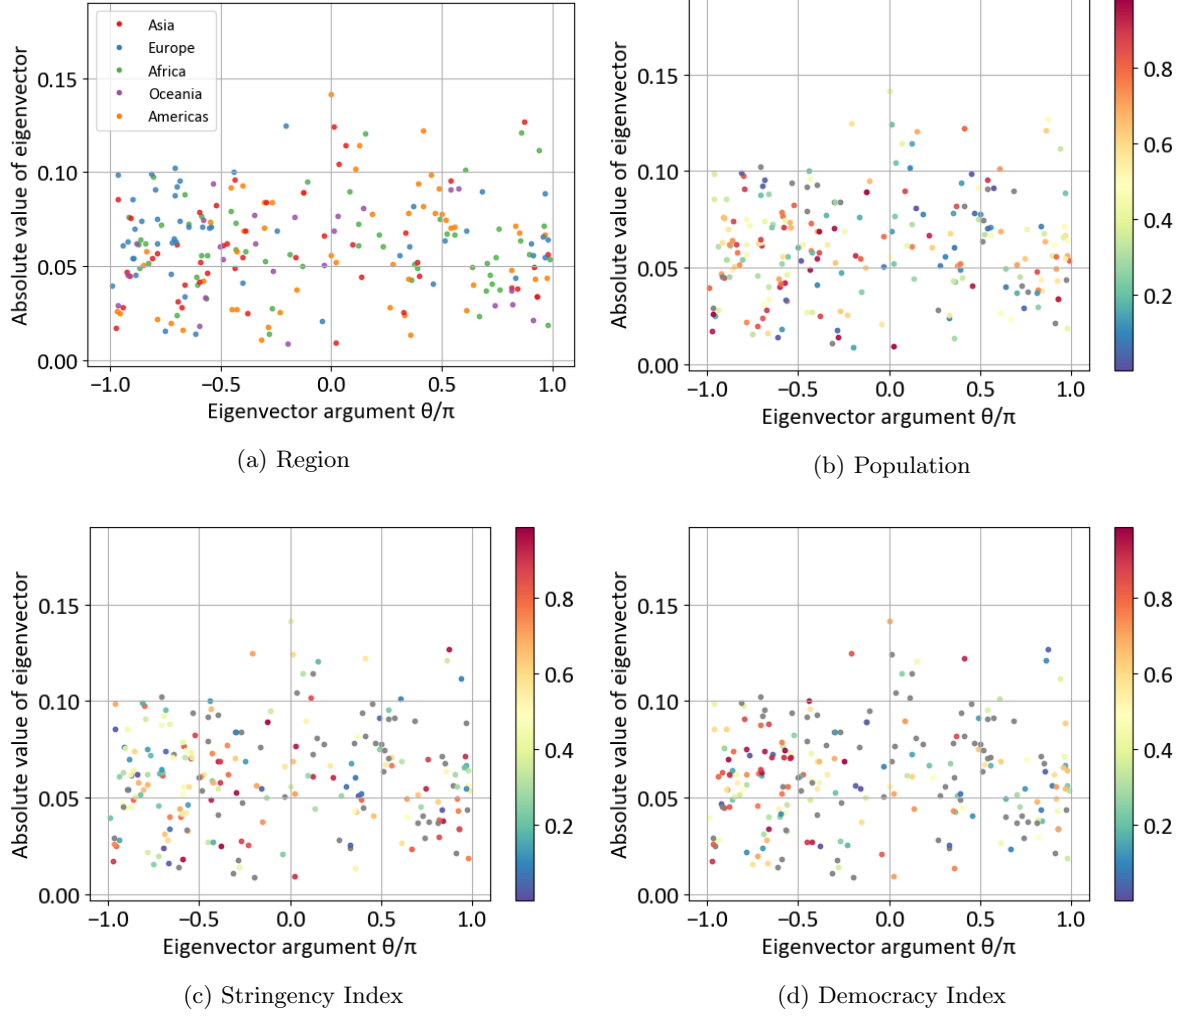

SI Figure 24: The second eigenvectors for the 2022 data. The panels are coloured by region, population, stringency index [2], and democracy index [1]. If a country has no population, stringency index, or democracy index data, it is coloured grey. The abscissa corresponds to the real axis, and the ordinate corresponds to the imaginary axis. Note that time progresses from right to left.

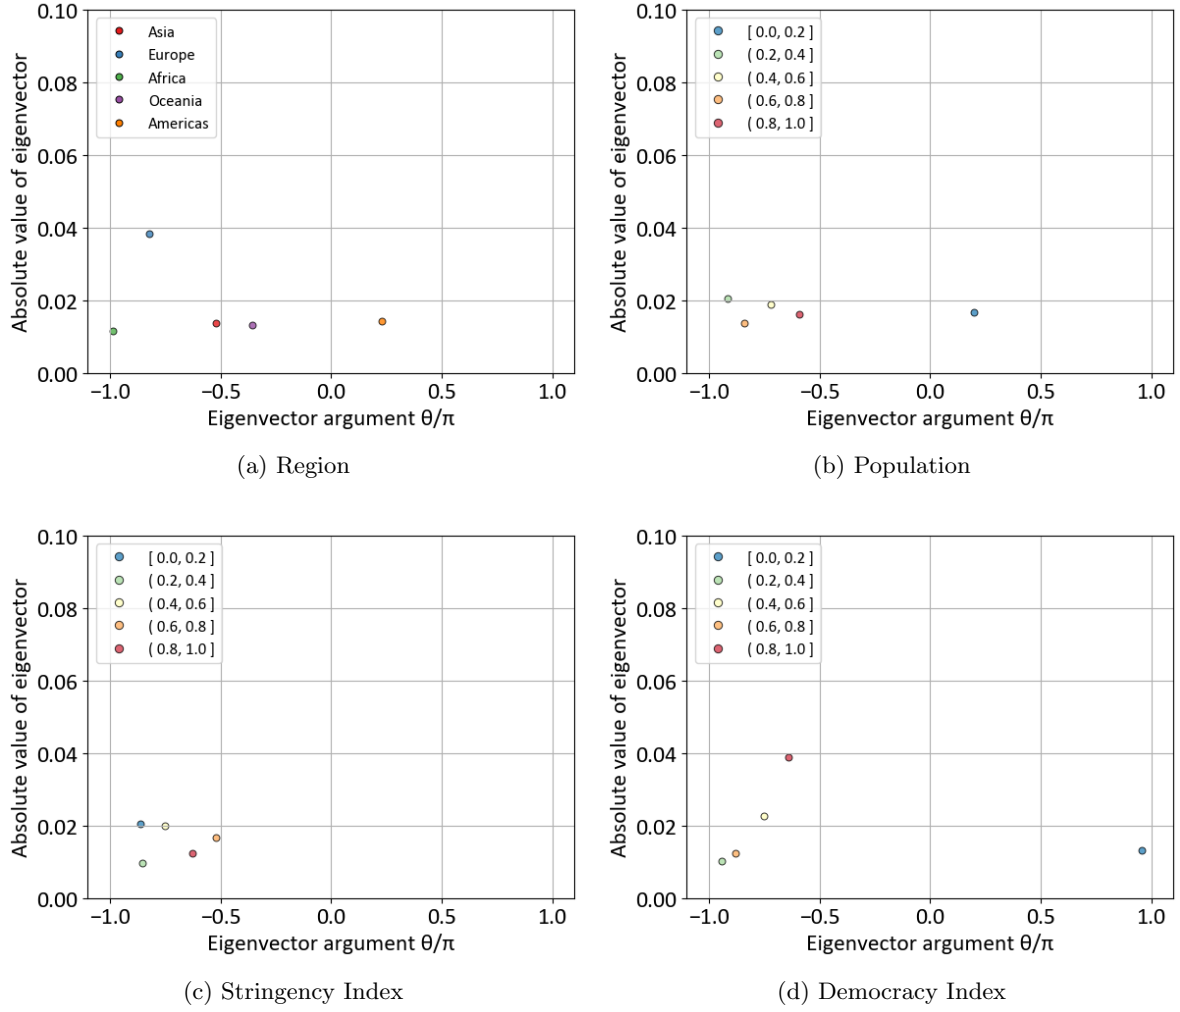

SI Figure 25: Barycentres of the second eigenvectors for the 2022 data. The panels are coloured by (a) region, (b) population, (c) stringency index [2], and (d) democracy index [1]. The abscissa corresponds to the argument, and the ordinate corresponds to the absolute value (amplitude) of the eigenvector. Note that time progresses from right to left.

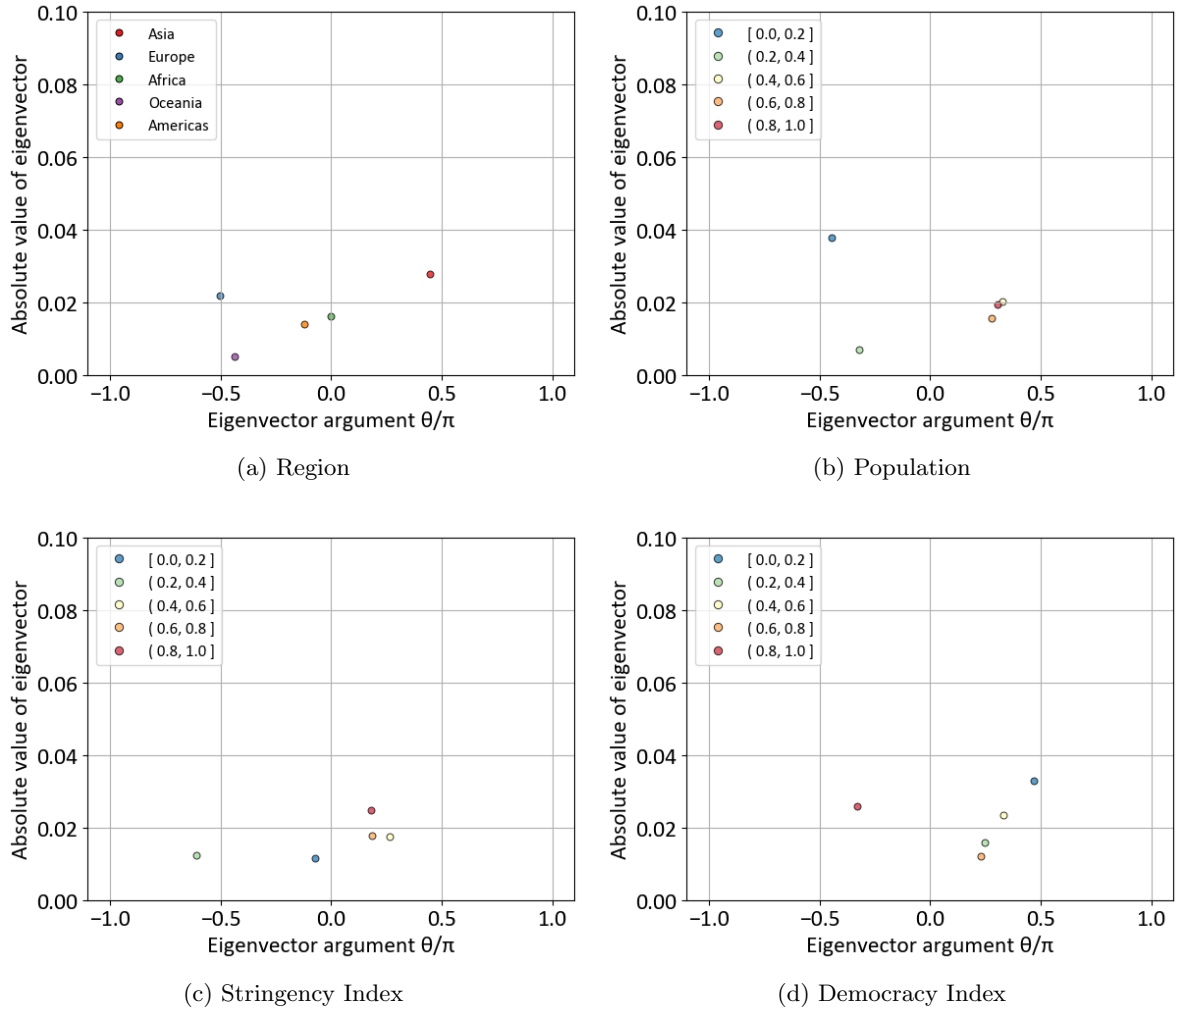

SI Figure 26: Barycentres of the third eigenvectors for the data of the entire period. The panels are coloured by (a) region, (b) population, (c) stringency index [2], and (d) democracy index [1]. The abscissa corresponds to the argument, and the ordinate corresponds to the absolute value (amplitude) of the eigenvector. Note that time progresses from right to left.

## 2 Supplementary tables

The following list contains the tables referred to in the main text.

SI Table 1: Sample size of the auxiliary data.

SI Table 2: Mean distance from the barycentre. The mean distance is calculated for each group.

SI Table 1: Sample sizes of auxiliary data. The numbers indicates the number of observed countries in each dataset.

|                   | 2020 | 2021 | 2022 |
|-------------------|------|------|------|
| Population        | 265  | 265  | 265  |
| GDP               | 257  | 251  | 233  |
| Stringency Index  | 183  | 180  | 180  |
| Containment Index | 184  | 180  | 180  |
| Vaccinations Rate | 39   | 217  | 213  |
| Democracy Index   | 167  | 167  | 167  |

SI Table 2: Mean distance from the barycentre. The mean distance is calculated for each group. The columns indicate the position within the five groups, which are divided by rank.

|                               | Group    | Entire<br>Period | 2020  | 2021  | 2022  |
|-------------------------------|----------|------------------|-------|-------|-------|
| Regions                       | Asia     | 0.030            | 0.044 | 0.046 | 0.041 |
|                               | Europe   | 0.027            | 0.030 | 0.053 | 0.038 |
|                               | Africa   | 0.027            | 0.040 | 0.055 | 0.044 |
|                               | Oceania  | 0.046            | 0.031 | 0.057 | 0.053 |
|                               | Americas | 0.026            | 0.041 | 0.053 | 0.055 |
| Population                    | First    | 0.036            | 0.034 | 0.054 | 0.058 |
|                               | Second   | 0.032            | 0.042 | 0.053 | 0.049 |
|                               | Third    | 0.029            | 0.043 | 0.054 | 0.047 |
|                               | Fourth   | 0.028            | 0.044 | 0.055 | 0.047 |
|                               | Fifth    | 0.032            | 0.044 | 0.053 | 0.050 |
| GDP/Population                | First    | 0.025            | 0.035 | 0.056 | 0.040 |
|                               | Second   | 0.041            | 0.043 | 0.054 | 0.058 |
|                               | Third    | 0.032            | 0.042 | 0.048 | 0.046 |
|                               | Fourth   | 0.027            | 0.037 | 0.058 | 0.048 |
|                               | Fifth    | 0.022            | 0.030 | 0.046 | 0.043 |
| Stringency Index              | First    | 0.028            | 0.046 | 0.063 | 0.038 |
|                               | Second   | 0.032            | 0.038 | 0.050 | 0.046 |
|                               | Third    | 0.032            | 0.048 | 0.053 | 0.048 |
|                               | Fourth   | 0.031            | 0.044 | 0.054 | 0.055 |
|                               | Fifth    | 0.030            | 0.039 | 0.047 | 0.059 |
| Containment<br>& Health Index | First    | 0.033            | 0.044 | 0.062 | 0.044 |
|                               | Second   | 0.030            | 0.045 | 0.057 | 0.044 |
|                               | Third    | 0.031            | 0.044 | 0.043 | 0.051 |
|                               | Fourth   | 0.031            | 0.044 | 0.055 | 0.047 |
|                               | Fifth    | 0.030            | 0.041 | 0.050 | 0.061 |
| Vaccination Rate              | First    | 0.028            | 0.038 | 0.062 | 0.045 |
|                               | Second   | 0.034            | 0.032 | 0.056 | 0.050 |
|                               | Third    | 0.029            | 0.028 | 0.056 | 0.051 |
|                               | Fourth   | 0.031            | 0.022 | 0.050 | 0.054 |
|                               | Fifth    | 0.032            | 0.035 | 0.045 | 0.047 |
| Democracy Index               | First    | 0.032            | 0.041 | 0.059 | 0.050 |
|                               | Second   | 0.029            | 0.040 | 0.049 | 0.047 |
|                               | Third    | 0.035            | 0.041 | 0.059 | 0.048 |
|                               | Fourth   | 0.026            | 0.038 | 0.055 | 0.049 |
|                               | Fifth    | 0.023            | 0.025 | 0.045 | 0.040 |

### 3 Analyses of the second eigenvectors

The second eigenvector for the 2020 data shows wide ranges for lead and lag, in contrast to the first eigenvector for the 2020 data (SI Figure 21). In terms of regions, the results are entirely different from those of the first eigenvector, with Africa leading and Europe lagging. This suggests that even during this period, Africa and Europe already show leading and lagging trends, respectively, as observed from 2021 to 2022. In terms of population, a lead-lag relationship can be observed, with countries with larger populations leading; however, population does not significantly affect the amplitude. The same results are found for the stringency index. Regarding the democracy index, the lead-lag relationships and amplitudes are completely opposite those observed with the first eigenvector. The leading trend is associated with a lower democracy index, and the lagging trend is associated with a higher democracy index. Moreover, a larger amplitude is associated with a lower democracy index, and a smaller amplitude is associated with a higher democracy index.

The second eigenvector for the 2021 data shows that the spread in the argument is the same as that for the first eigenvector (SI Figure 22), but there are some differences in the results. The first eigenvector does not show outstanding features in region or democracy index, but the second eigenvector captures the leading trend of European countries and a high democracy index. There are no distinctive results for the population or stringency indices, similar to the results of the analyses for the first eigenvector.

### References

- [1] Economist Intelligence. Democracy Index 2022. <https://www.eiu.com/n/campaigns/democracy-index-2022/>. Accessed: 2023-09-01.
- [2] Our World in Data. Covid-19: Stringency index. <https://ourworldindata.org/covid-stringency-index>. Accessed: 2023-09-01.
